# Supplementary material for: Single and Multiple Dose PK–PD Characterization for Carisoprodol. Part I: Pharmacokinetics, Metabolites, and 2C19 Phenotype Influence. Double-Blind, Placebo-Controlled Clinical Trial in Healthy Volunteers
Source: MDPI journal article supplement (doi:10.3390/jcm11030858), 2022-02-06

Figure S1. mean plasma concentration vs time. carisoprodol. day 7

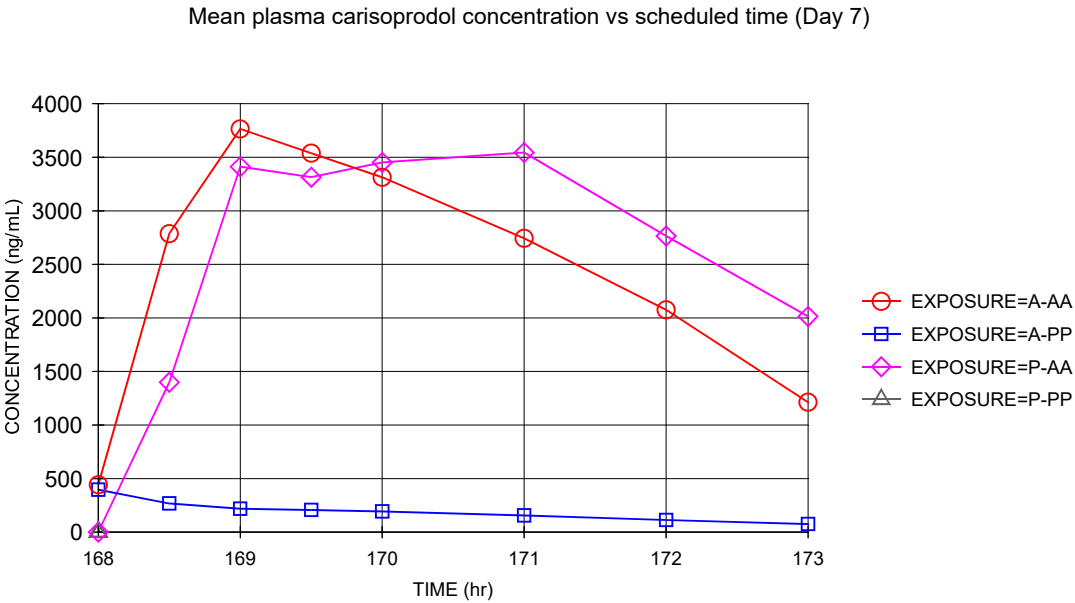

Figure S2. mean plasma concentration vs time. meprobamate. day 7

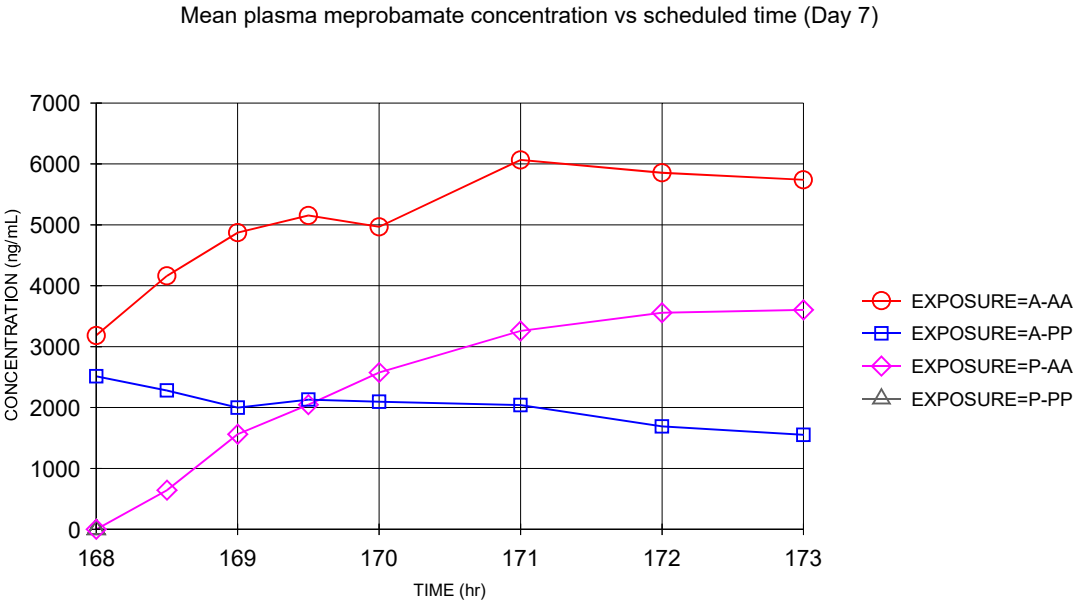

Supplement: s1 [file s1]
